# Supplementary material for: RNAcontext: A New Method for Learning the Sequence and Structure Binding Preferences of RNA-Binding Proteins
Source: PLoS Comput Biol. 2010 Jul 1;6(7):e1000832. doi: 10.1371/journal.pcbi.1000832 (PMC2895634; doi:10.1371/journal.pcbi.1000832)
Supplement: Table S1 — Properties of the sequences in the input sets. The composition of Sets A and B in terms of relative proportions of stem-loops and weakly structured sequences among their Positive, Negative and Other groups. The input sets are partitioned into these three groups according to their RNAcompete-measured affinities. The sequences with affinities above a threshold are defined as Positive; the sequences with affinities below the median affinities over all the sequences in the given set are defined as Negative and the remaining sequences are placed in the Other group. Within each group, the number of weakly structured sequences and stem-loops are displayed. For RNAcontext and MatrixREDUCE all the sequences in Positive, Negative and Other categories are used for training whereas when running MEMERIS, only Positive sequences are used for training. The test sets are comprised of all sequences in the Positive and Negative groups. (0.01 MB PDF) [file pcbi.1000832.s004.pdf]

| Proteins | Set A    |           |          |           |        |           | Set B    |           |          |           |        |           |
|----------|----------|-----------|----------|-----------|--------|-----------|----------|-----------|----------|-----------|--------|-----------|
|          | positive |           | negative |           | other  |           | positive |           | negative |           | other  |           |
|          | weak     | stem-loop | weak     | stem-loop | weak   | stem-loop | weak     | stem-loop | weak     | stem-loop | weak   | stem-loop |
| Vts1p    | 289      | 260       | 16,863   | 3409      | 11,390 | 9,107     | 282      | 239       | 16,697   | 3373      | 11,136 | 8,885     |
| SLM2     | 520      | 1         | 18,373   | 9,984     | 19,109 | 14,819    | 566      | 5         | 18,143   | 10,100    | 18,879 | 14,671    |
| YB1      | 555      | 59        | 15,985   | 11,838    | 29,317 | 21,858    | 519      | 62        | 15,701   | 11,784    | 29,177 | 21,905    |
| RBM4     | 726      | 6         | 16,762   | 9,798     | 17,140 | 9,231     | 792      | 14        | 16,655   | 9,659     | 16,841 | 9,127     |
| SF2      | 523      | 71        | 17,961   | 12,616    | 22,713 | 11,922    | 529      | 92        | 17,867   | 12,282    | 22,378 | 12,017    |
| FUSIP1   | 201      | 436       | 21,181   | 4,148     | 9,918  | 15,149    | 234      | 426       | 20,986   | 4,096     | 9,928  | 15,185    |
| HuR      | 608      | 1         | 16,379   | 13,422    | 24,877 | 4,348     | 586      | 0         | 15,944   | 13,332    | 25,095 | 4,405     |
| U1A      | 310      | 322       | 8,232    | 325       | 6,752  | 1,740     | 277      | 328       | 8,250    | 337       | 6,665  | 1738      |
| PTB      | 467      | 62        | 21,315   | 6,908     | 18,040 | 15,356    | 448      | 72        | 21,309   | 6,820     | 17,779 | 15,332    |
